# Supplementary material
Source: Springer Nature journal article supplement (https://www.springermedizin.de/resource/supplementary/12891_2013_2033_MOESM1_ESM.pdf/9510144)

**a:** Supine

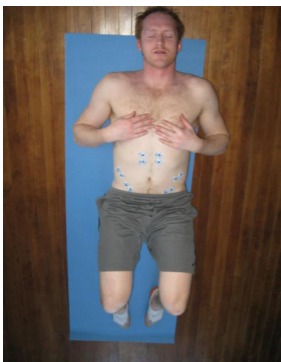

**b:** ATNR Left

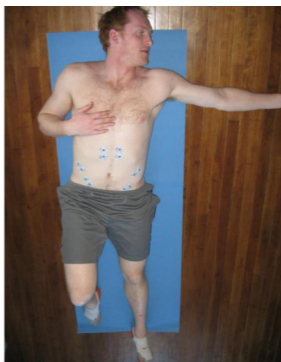

**c:** Cervical Rotation to the Left

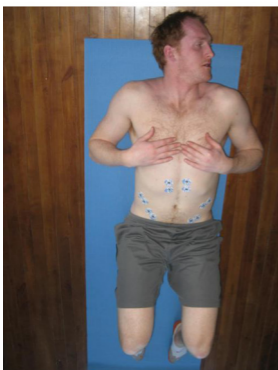

**d:** Morrow Stage 1 Defined as Cervical Extension

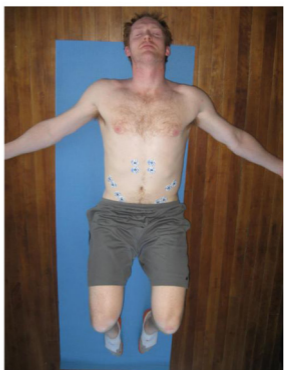

**e:** Morrow Stage 2 Defined as Cervical Flexion

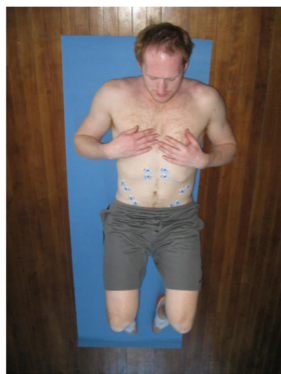

Supplement: MOESM1 [file 9510144]
